# Supplementary material
Source: publisher site journal article supplement (https://www.dovepress.com/article/561941)
Supplement: Supplementary file 1 [file 561941%20Revised%20supplementary%20table%201_.docx]

**Supplementary Table 1: ICD-9 Codes Used to Identify Complications**

| Complication | ICD-9 Code(s) | Description |
| --- | --- | --- |
| Hemorrhage / Excessive bleeding | 666.1x; 998.11; 641.3x | Immediate postpartum hemorrhage; hemorrhage complicating a procedure; antepartum hemorrhage |
| Blood transfusion | 99.04; 99.00–99.09 | Transfusion of packed red blood cells or other blood components |
| Uterine atony | 666.0x; 666.1x | Atony of uterus; uterine hemorrhage due to atony |
| Disseminated intravascular coagulation (DIC) | 286.6; 666.3x | Defibrination syndrome; obstetric coagulation defects |
| Infection | 998.59; 615.1; 637.0–637.9; 614.9 | Postoperative infection; acute endometritis; septic abortion; pelvic infection |
| Retained products of conception | 631; 634.91; 637.91 | Abnormal product of conception; incomplete abortion |
| Uterine perforation | 665.7; 998.2 | Injury to pelvic organs; accidental puncture during procedure |
| Cervical laceration | 665.3x; 665.5x | Laceration of cervix or other genital tract trauma |
| Emergency hysterectomy | 68.3–68.9 | Subtotal or total abdominal/vaginal hysterectomy |

DIC, disseminated intravascular coagulation; ICD-9, International Classification of Diseases, Ninth Revision.

ICD-9 codes were used to identify candidate cases for each complication. All identified events were manually validated through review of operative reports, anesthesia records, and postoperative documentation to confirm clinical relevance and timing.
